# Supplementary material for: Purely elastic flow instabilities in microscale cross-slot devices
Source: Royal Society of Chemistry journal article supplement (doi:10.1039/c5sm01298h), 2015-01-01
Supplement: c5sm01298h5.pdf [file c5sm01298h5.pdf]

## SUPPLEMENTARY INFORMATION

### Purely elastic flow instabilities in microscale cross-slot devices

P. C. Sousa<sup>a</sup>, F.T. Pinho<sup>b</sup>, M.S.N. Oliveira<sup>c</sup> and M. A. Alves<sup>a</sup>

<sup>a</sup> Departamento de Engenharia Química, CEFT, Faculdade de Engenharia da Universidade do Porto, Rua Dr. Roberto Frias, 4200-465 Porto, Portugal. E-mail: mmalves@fe.up.pt

<sup>b</sup> CEFT, Departamento de Engenharia Mecânica, Faculdade de Engenharia da Universidade do Porto, Rua Dr. Roberto Frias, 4200-465 Porto, Portugal.

<sup>c</sup> James Weir Fluids Laboratory, Department of Mechanical and Aerospace Engineering, University of Strathclyde, Glasgow G1 1XJ, UK.

Four movies are included as supplementary information, illustrating the types of flow regimes observed experimentally:

**Video S1. Movie of the steady symmetric flow** – the test fluid is distilled water flowing at a Reynolds number  $Re = 5.5$ . The channel aspect ratio is  $AR = 1.0$ . File name: S1\_SymmetricFlow.avi

**Video S2. Movie of the steady symmetric flow** – the test fluid is an aqueous solution of 190 ppm of PAA and 80 wt. % of glycerol flowing at a Weissenberg number,  $Wi = 0.13$ , and a Reynolds number,  $Re = 3.2 \times 10^{-6}$ . The channel aspect ratio is  $AR = 1.0$ . File name: S2\_SymmetricFlow.avi

**Video S3. Movie of the steady asymmetric flow** – the test fluid is an aqueous solution of 200 ppm of PAA and 70 wt. % of glycerol flowing at a Weissenberg number,  $Wi = 7.2$ , and a Reynolds number,  $Re = 7.7 \times 10^{-4}$ . The channel aspect ratio is  $AR = 1.0$ . File name: S3\_SteadyAsymmetricFlow.avi

**Video S4. Movie of the time-dependent flow** – the test fluid is an aqueous solution of 300 ppm of PAA and 50 wt. % of glycerol flowing at a Weissenberg number,  $Wi = 44.6$ , and a Reynolds number,  $Re = 8.3 \times 10^{-2}$ . The channel aspect ratio is  $AR = 1.6$ . File name: S4\_TimeDependentFlow.avi
